# Supplementary material for: Branched-chain amino acids deficiency promotes diabetic cardiomyopathy by activating autophagy of cardiac fibroblasts
Source: PubMed Central journal article supplement (PMC11626946; doi:10.7150/thno.102708), 2024-10-28
Supplement: thnov14p7333s1.pdf [file thnov14p7333s1.pdf]

Figure S1

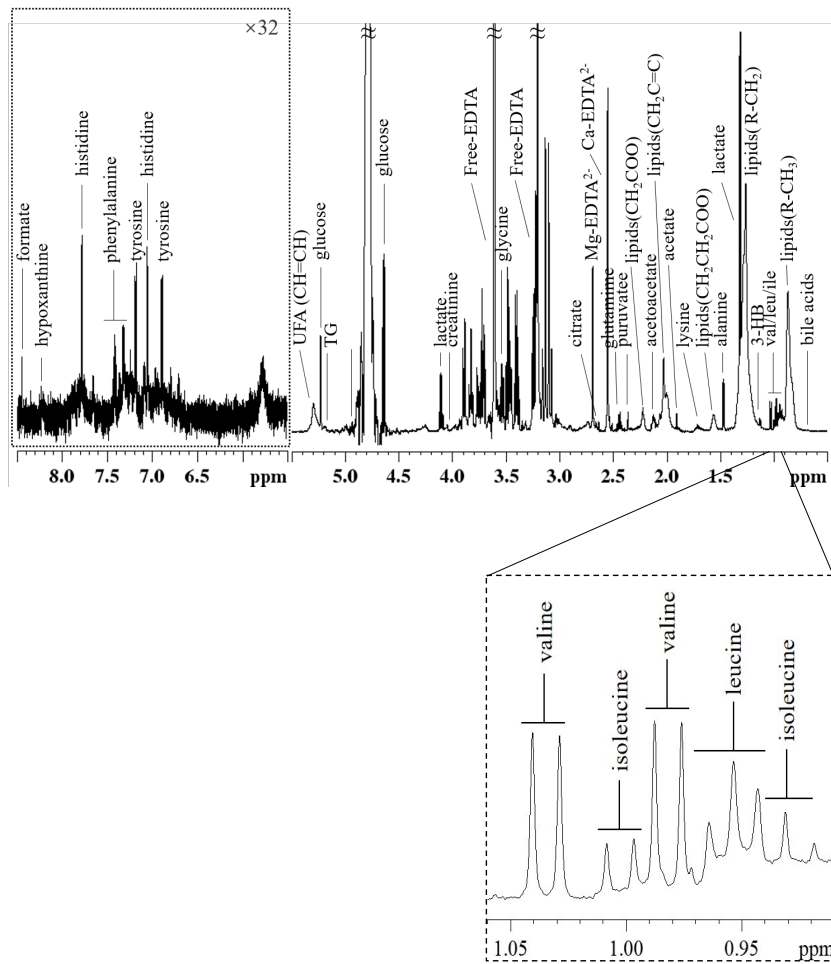

Figure S1. Metabolite profiling using nuclear magnetic resonance (NMR). Related to Figure 1.

**Figure S2**

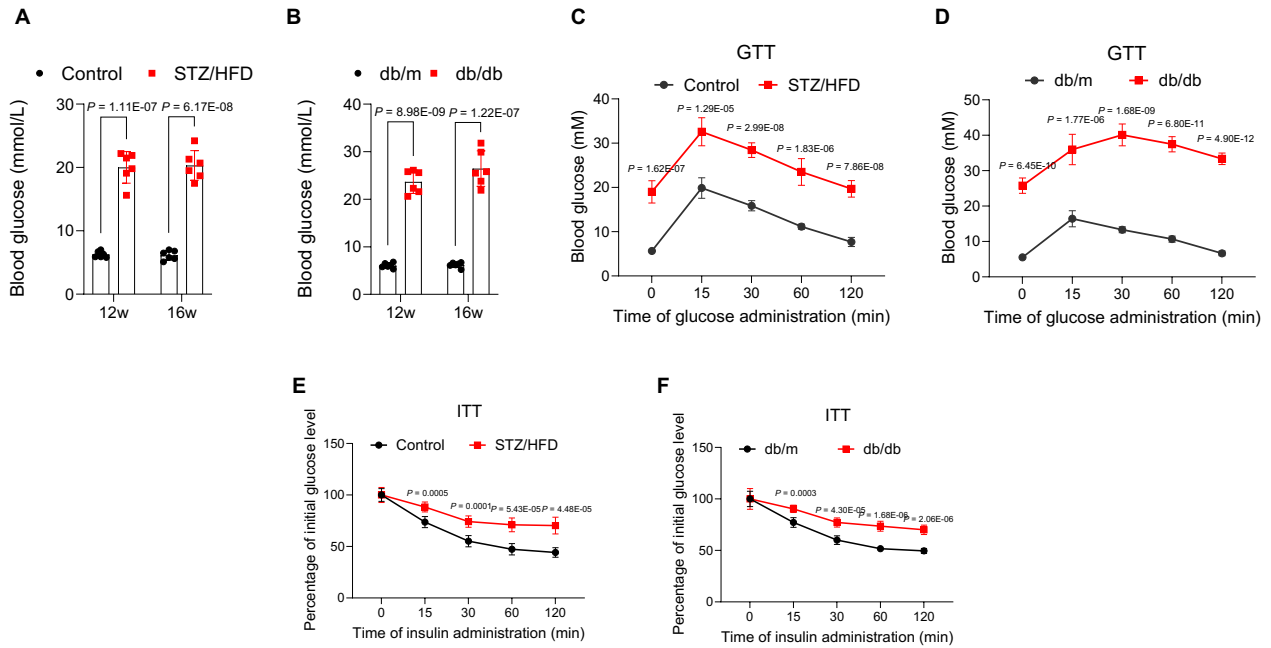

**Figure S2. Information from STZ/HFD mice and db/db mice. Related to Figure 2.**

A-B, Blood glucose of STZ/HFD T2D mice (A) and db/db T2D mice (B) in indicated groups (n = 6 mice in each group). C, D, Glucose tolerance were measured in fasted STZ/HFD T2D mice (C) and db/db (D) mice after 16 weeks of feeding (n = 6 mice in each group). E, F, Insulin tolerance were measured in fasted STZ/HFD T2D mice (E) and db/db T2D mice (F) after 16 weeks of feeding (n = 6 mice in each group). Data shown are expressed as mean  $\pm$  SEM. ns  $P > 0.05$ , \* $P < 0.05$ , \*\*\* $P < 0.001$ , using Student's *t*-test.

**Figure S3**

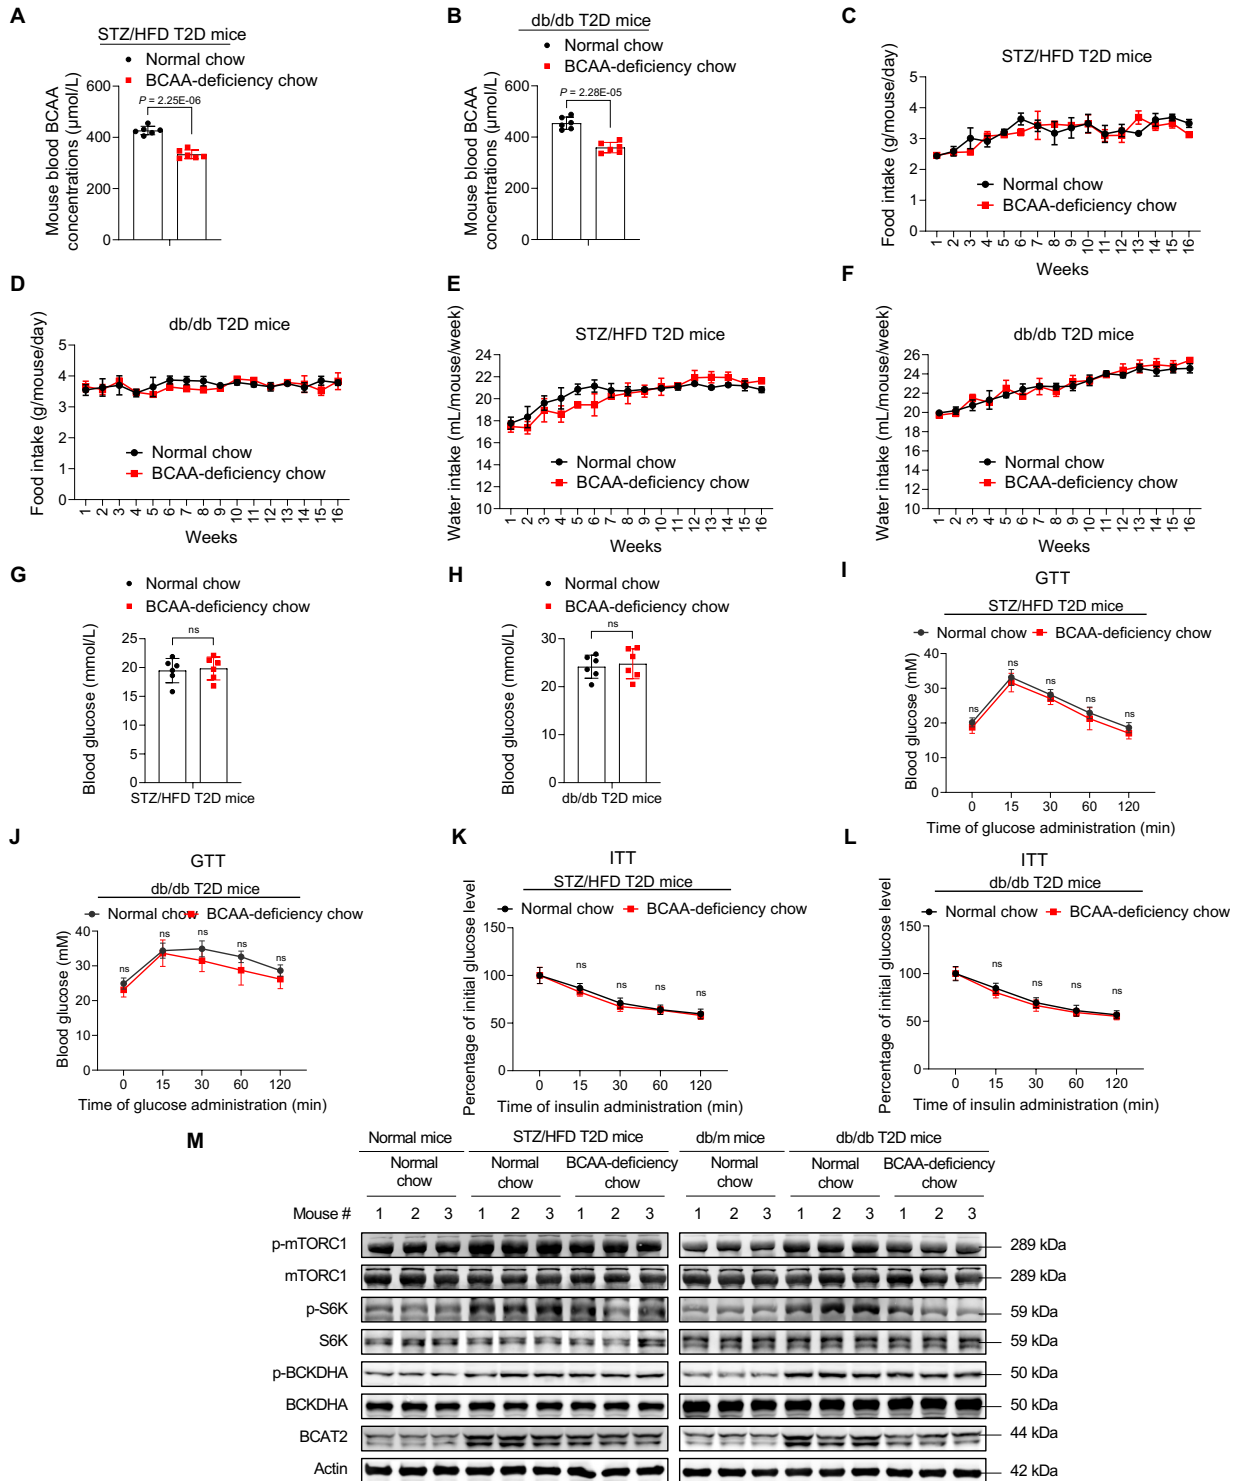

**Figure S3. Information from T2D mice for either standard chow or BCAA-deficiency chow. Related to Figure 2.**

A,B, Plasma concentration of BCAA in fasted STZ/HFD T2D mice (A) and db/db T2D mice (B) after 16 weeks of BCAA-deficiency feeding (n = 6 mice in each group). C,D, Food intake of STZ/HFD T2D mice (C) and db/db T2D mice (D) in indicated groups (n = 6 mice in each group). E,F, Water intake of STZ/HFD T2D mice (E) and db/db T2D mice (F) in indicated groups (n = 6 mice in each group). G,H, Blood glucose of STZ/HFD T2D mice (G) and db/db T2D mice (H) after 16 weeks of BCAA-deficiency feeding (n = 6 mice in each group). I,J, Glucose tolerance were measured in STZ/HFD T2D mice (I) and db/db T2D mice (J) in indicated groups (n = 6 mice in each group). K,L, Insulin tolerance were measured in fasted STZ/HFD T2D mice (K) and db/db T2D mice (L) in indicated groups (n = 6 mice in each group). M, Western blot analysis of mTORC1 pathway and BCAA metabolic enzymes in heart tissue samples from STZ/HFD and db/db T2D mice treated with BCAA-deficiency chow (n = 3 mice in each group). Data shown are expressed as mean  $\pm$  SEM. ns  $P > 0.05$ , \*  $P < 0.05$ , \*\*\*  $P < 0.001$ , using Student's *t*-test.

**Figure S4**

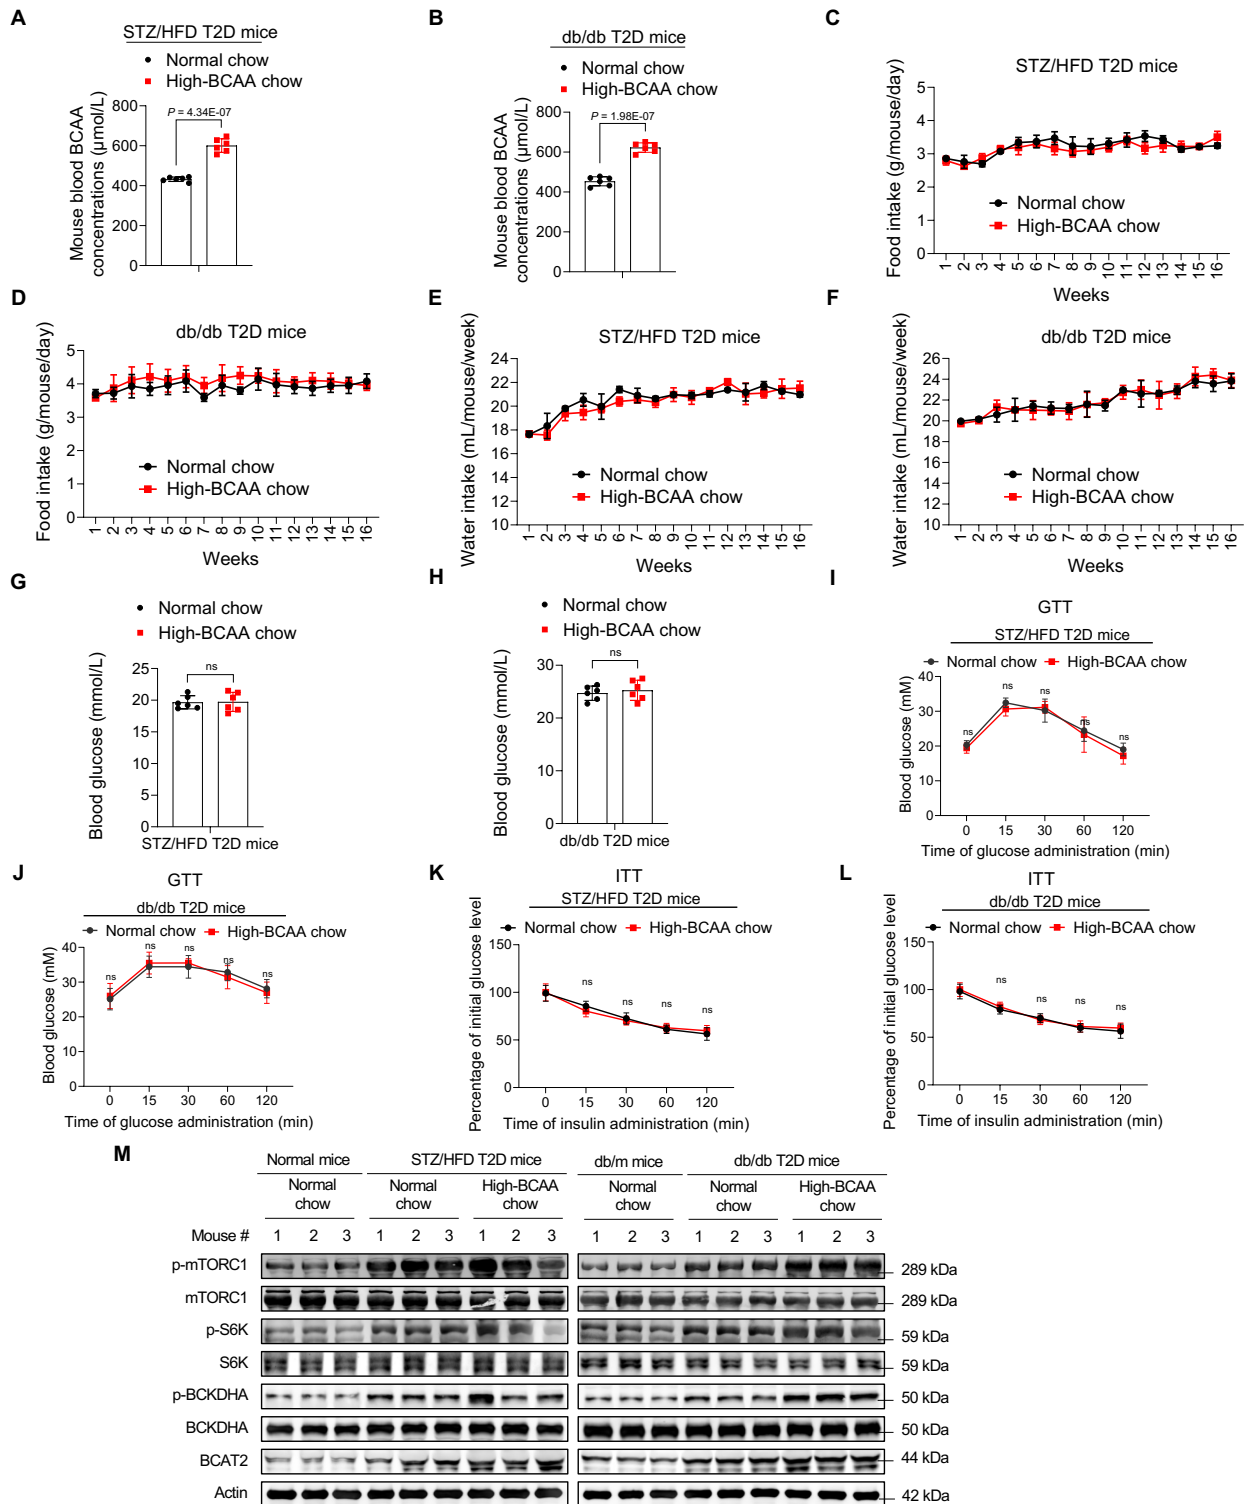

**Figure S4. Information from T2D mice for either standard chow or High-BCAA chow. Related to Figure 3.**

A,B, Plasma concentration of BCAA in faeted STZ/HFD T2D mice (A) and db/db T2D mice (B) after 16 weeks of High-BCAA feeding (n = 6 mice in each group). C,D, Food intake of STZ/HFD T2D mice (C) and db/db T2D mice (D) in indicated groups (n = 6 mice in each group). E,F, Water intake of STZ/HFD T2D mice (E) and db/db T2D mice (F) in indicated groups (n = 6 mice in each group). G,H, Blood glucose of STZ/HFD T2D mice (G) and db/db T2D mice (H) after 16 weeks of High-BCAA feeding (n = 6 mice in each group). I,J, Glucose tolerance were measured in STZ/HFD T2D mice (I) and db/db T2D mice (J) in indicated groups (n = 6 mice in each group). K,L, Insulin tolerance were measured in fasted STZ/HFD T2D mice (K) and db/db T2D mice (L) in indicated groups (n = 6 mice in each group). M, Western blot analysis of mTORC1 pathway and BCAA metabolic enzymes in heart tissue samples from STZ/HFD and db/db T2D mice treated with High-BCAA chow (n = 3 mice in each group). Data shown are expressed as mean  $\pm$  SEM. ns  $P > 0.05$ , \* $P < 0.05$ , \*\*\* $P < 0.001$ , using Student's *t*-test.

**Table S1. Characteristics of Participants in Discovery group**

| Characteristics                   | Diabetics controls | DCM Patients | P Value      |
|-----------------------------------|--------------------|--------------|--------------|
| Number (n)                        | 19                 | 15           | –            |
| Age (years)                       | 61.74±10.25        | 66.07±11.88  | –            |
| Male (%)                          | 13 (68.42%)        | 5(33.33%)    | –            |
| BMI (kg/m <sup>2</sup> )          | 24.41±4.00         | 23.76±3.30   | 0.6283 ns    |
| Duration of diabetes (years)      | 8.74±4.04          | 14.74±4.24   | 0.006***     |
| Antidiabetic drugs usage (%)      | 11 (57.89%)        | 11 (73.33%)  | –            |
| Heart rates (/min)                | 83.74±13.42        | 82.27±15.83  | –            |
| SBP (mm Hg)                       | 128.37±14.68       | 125.47±13.61 | 0.5812 ns    |
| DBP (mm Hg)                       | 79.63±10.43        | 69.13±13.53  | 0.0220 *     |
| Fasting blood glucose (mmol/L)    | 7.11±1.97          | 7.19±1.44    | 0.9003 ns    |
| HbA1c (%)                         | 8.06±2.36          | 7.68±1.43    | 0.6100 ns    |
| TC (mmol/L)                       | 3.95±1.16          | 4.03±0.72    | 0.8184 ns    |
| Triglycerides(mmol/L)             | 1.63±0.61          | 1.39±0.39    | 0.2299 ns    |
| Creatinine (µmol/L)               | 81.21±28.26        | 105.00±93.07 | 0.3291 ns    |
| BUN (µmol/L)                      | 7.63±2.43          | 9.17±3.83    | 0.1893 ns    |
| Uric acid (µmol/L)                | 331.89±59.61       | 349.40±95.61 | 0.5429 ns    |
| Cystatin c (mg/L)                 | 1.19±0.43          | 1.70±0.83    | 0.0317 *     |
| eGFR (mL/min/1.73m <sup>2</sup> ) | 114.62±40.69       | 97.63±39.58  | 0.2573 ns    |
| LV (mm)                           | 42.79±3.25         | 56.20±3.73   | <0.0001 **** |
| LA (mm)                           | 36.21±6.34         | 45.47±7.49   | 0.0009 ***   |
| RV (mm)                           | 20.74±1.87         | 23.40±2.91   | 0.0046 **    |
| RA Major (mm)                     | 42.42±4.11         | 47.87±8.63   | 0.0294 *     |
| RA Minor (mm)                     | 33.21±3.52         | 39.00±8.85   | 0.0200 *     |
| IVS (mm)                          | 9.95±1.40          | 10.87±0.78   | 0.0385 *     |
| LVPW (mm)                         | 9.63±1.11          | 10.60±0.69   | 0.0085 **    |
| E/e'                              | 7.84±0.62          | 9.79±1.49    | <0.0001 **** |
| LVEF (%)                          | 61.16±1.56         | 52.67±4.79   | <0.0001 **** |
| LVFS (%)                          | 33.26±1.81         | 29.53±2.06   | <0.0001 **** |

Data are expressed as mean±SEM. The nonparametric two-tailed Student's t-test was used to compare groups. Significance is indicated as \*, $P < 0.05$ ; \*\*, $P < 0.01$ ; \*\*\*,  $P < 0.001$ ; \*\*\*\*,  $P < 0.0001$ .

**Table S2. Characteristics of Participants in Validation group**

| Characteristics                      | ①Healthy<br>controls | ②Diabetics<br>Patients | ③DCM<br>Patients | ①VS②<br>P Value | ②VS③<br>P Value |
|--------------------------------------|----------------------|------------------------|------------------|-----------------|-----------------|
| Number (n)                           | 30                   | 129                    | 123              | –               | –               |
| Age (years)                          | 62.43±12.65          | 63.71±14.40            | 63.43±13.10      | –               | –               |
| Male (%)                             | 15 (50.00%)          | 65 (50.39%)            | 63 (51.22%)      | –               | –               |
| BMI (kg/m <sup>2</sup> )             | 23.66±2.35           | 25.47±5.35             | 25.55±5.07       | 0.0799 ns       | 0.9205 ns       |
| Heart rates (/min)                   | 73.63±8.38           | 81.59±12.90            | 86.52±16.24      | –               | –               |
| SBP (mm Hg)                          | 129.50±13.36         | 134.02±18.82           | 136.15±20.84     | 0.2438 ns       | 0.3948 ns       |
| DBP (mm Hg)                          | 73.40±11.81          | 78.01±11.32            | 77.41±13.33      | 0.0496*         | 0.7044 ns       |
| Duration of diabetes<br>(years)      | –                    | 9.09±5.06              | 13.80±5.49       | –               | <0.0001****     |
| Antidiabetic<br>drugs<br>usage (%)   | –                    | 80 (62.06%)            | 83 (67.48%)      | –               | –               |
| Fasting blood glucose<br>(mmol/L)    | 4.93±0.67            | 7.66±2.51              | 8.37±3.45        | <0.0001**       | 0.0613 ns       |
| HbA1c (%)                            | 5.05±0.52            | 8.14±1.68              | 8.07±1.74        | < 0.0001**      | 0.7368 ns       |
| TC (mmol/L)                          | 4.52±1.08            | 4.35±1.19              | 4.34±1.20        | 0.4821 ns       | 0.9160 ns       |
| Triglycerides (mmol/L)               | 1.52±0.36            | 1.7±0.99               | 1.67±0.91        | 0.2534 ns       | 0.6192 ns       |
| Creatinine (μmol/L)                  | 76.43±17.93          | 82.09±74.41            | 78.38±46.34      | 0.6819 ns       | 0.6390 ns       |
| BUN (μmol/L)                         | 7.76±7.60            | 7.36±3.79              | 6.83±2.78        | 0.6841 ns       | 0.2103 ns       |
| Uric acid (μmol/L)                   | 312.83±68.79         | 328.47±108.26          | 326.11±113.75    | 0.4535 ns       | 0.8667 ns       |
| Cystatin c (mg/L)                    | 0.99±0.27            | 1.20±0.62              | 1.32±0.63        | 0.0805 ns       | 0.1335 ns       |
| eGFR<br>(mL/min/1.73m <sup>2</sup> ) | 110.87±39.26         | 120.11±47.42           | 132.07±64.68     | 0.3265 ns       | 0.0955 ns       |
| LV (mm)                              | 44.43±5.00           | 44.52±5.12             | 54.51±3.54       | 0.9341 ns       | <0.0001****     |
| LA (mm)                              | 33.57±4.92           | 34.15±5.68             | 42.02±4.74       | 0.6084 ns       | <0.0001****     |
| RV (mm)                              | 19.70±2.60           | 20.78±2.58             | 22.42±1.93       | 0.0431*         | <0.0001****     |
| RA Major (mm)                        | 41.03±4.18           | 42.29±3.59             | 45.67±4.73       | 0.0999 ns       | <0.0001****     |
| RA Minor (mm)                        | 32.73±3.23           | 33.40±5.32             | 37.02±4.07       | 0.5168 ns       | <0.0001****     |
| IVS (mm)                             | 9.60±1.17            | 9.98±1.28              | 10.42±1.38       | 0.1372 ns       | 0.0098**        |
| LVPW (mm)                            | 9.20±1.05            | 9.55±0.94              | 10.30±1.38       | 0.0757 ns       | <0.0001****     |
| E/e'                                 | 7.43±0.80            | 7.79±0.83              | 9.94±1.62        | 0.0340*         | <0.0001****     |
| LVEF (%)                             | 61.23±5.98           | 62.47±4.08             | 53.87±3.32       | 0.1813 ns       | <0.0001****     |
| LVFS (%)                             | 32.87±1.20           | 33.53±2.98             | 29.56±2.63       | 0.2379 ns       | <0.0001****     |

Data are expressed as mean±SEM. The nonparametric two-tailed Student's t-test was used to compare groups. Significance is indicated as \*, $P < 0.05$ ; \*\*, $P < 0.01$ ; \*\*\*,  $P < 0.001$ ; \*\*\*\*,  $P < 0.0001$ .

**Table S3. Characteristics of Participants in Validation group**

| Characteristics                   | ①Healthy controls | ②Diabetics Patients | ③DCM Patients | ①VS② P Value | ②VS③ P Value |
|-----------------------------------|-------------------|---------------------|---------------|--------------|--------------|
| Number (n)                        | 30                | 30                  | 30            | –            | –            |
| Age (years)                       | 58.23±19.43       | 62.66±10.04         | 65.57±11.60   | –            | –            |
| Male (%)                          | 18 (60.00%)       | 7 (76.67%)          | 16 (53.33%)   | –            | –            |
| BMI (kg/m <sup>2</sup> )          | 23.79±4.34        | 25.24±3.02          | 25.54±3.05    | 0.01441 ns   | 0.7194 ns    |
| Heart rates (/min)                | 83.67±18.89       | 82.17±11.21         | 81.80±16.43   | –            | –            |
| SBP (mm Hg)                       | 129.70±16.12      | 136.30±20.90        | 141.97±21.60  | 0.1834 ns    | 0.3142 ns    |
| DBP (mm Hg)                       | 79.23±13.14       | 82.90±14.55         | 78.83±11.36   | 0.3182 ns    | 0.2404 ns    |
| Duration of diabetes (years)      | –                 | 7.27±4.69           | 12.13±5.50    | –            | 0.0006***    |
| Antidiabetic drugs usage (%)      | –                 | 21 (70.00%)         | 26 (86.67%)   | –            | –            |
| Fasting blood glucose (mmol/L)    | 5.58±1.14         | 8.40±3.08           | 8.21±2.38     | <0.0001**    | 0.7951 ns    |
| HbA1c (%)                         | 6.40±0.87         | 7.86±1.38           | 8.76±1.81     | < 0.0001**   | 0.0372*      |
| TC (mmol/L)                       | 4.25±0.75         | 4.39±1.00           | 4.46±1.05     | 0.5658 ns    | 0.7797 ns    |
| Triglycerides (mmol/L)            | 1.40±0.82         | 1.72±0.66           | 1.76±0.91     | 0.1085 ns    | 0.8187 ns    |
| Creatinine (μmol/L)               | 72.87±17.55       | 78.40±31.50         | 74.87±20.71   | 0.4120 ns    | 0.6157 ns    |
| BUN (μmol/L)                      | 6.72±1.83         | 7.51±3.15           | 7.77±2.01     | 0.2428 ns    | 0.7192 ns    |
| Uric acid (μmol/L)                | 325.23±104.81     | 351.83±132.10       | 332.73±127.82 | 0.3991 ns    | 0.5779 ns    |
| Cystatin c (mg/L)                 | 1.16±0.28         | 1.26±0.47           | 1.28±0.44     | 0.3523 ns    | 0.8628 ns    |
| eGFR (mL/min/1.73m <sup>2</sup> ) | 121.07±32.10      | 121.63±38.13        | 112.65±30.19  | 0.9520 ns    | 0.3242 ns    |
| LV (mm)                           | 44.77±3.71        | 44.43±5.21          | 52.17±4.55    | 0.7801 ns    | <0.0001****  |
| LA (mm)                           | 33.77±5.76        | 35.57±3.81          | 42.47±4.10    | 0.1658 ns    | <0.0001****  |
| RV (mm)                           | 20.07±2.22        | 20.70±1.44          | 22.03±2.20    | 0.2027 ns    | 0.0083**     |
| RA Major (mm)                     | 42.80±4.22        | 42.40±3.12          | 46.60±3.02    | 0.6829 ns    | <0.0001****  |
| RA Minor (mm)                     | 33.07±4.22        | 33.60±4.61          | 36.77±4.30    | 0.6178 ns    | <0.0001****  |
| IVS (mm)                          | 9.87±1.28         | 10.17±1.32          | 11.23±1.54    | 0.3837 ns    | 0.0098**     |
| LVPW (mm)                         | 9.37±1.14         | 9.60±0.99           | 10.57±1.48    | 0.4079 ns    | <0.0001****  |
| E/e'                              | 7.38±0.63         | 7.55±0.58           | 10.04±1.46    | 0.3011 ns    | <0.0001****  |
| LVEF (%)                          | 61.50±5.18        | 62.40±1.80          | 54.30±7.67    | 0.3806 ns    | <0.0001****  |
| LVFS (%)                          | 33.63±2.07        | 33.83±1.61          | 29.20±3.75    | 0.6834 ns    | <0.0001****  |

Data are expressed as mean±SEM. The nonparametric two-tailed Student's t-test was used to compare groups. Significance is indicated as \*,  $P < 0.05$ ; \*\*,  $P < 0.01$ ; \*\*\*,  $P < 0.001$ ; \*\*\*\*,  $P < 0.0001$ .

**Table S4. Amino Acids Rodent Diet and Same Halved or Double BCAA**

| <b>Diet#</b>                     | <b>FB-A10021B</b> |        | <b>FB-A10022</b> |        | <b>FB-A10022</b> |        |
|----------------------------------|-------------------|--------|------------------|--------|------------------|--------|
|                                  | Control           |        | Halved BCAA      |        | Double BCAA      |        |
|                                  | gm%               | kcal%  | gm%              | kcal%  | gm%              | kcal%  |
| Protein                          | 17.00             | 17.56  | 15.60            | 16.12  | 19.80            | 20.45  |
| Carbohydrate                     | 68.55             | 70.82  | 69.95            | 72.26  | 65.75            | 67.92  |
| Fat                              | 5.00              | 11.62  | 5.00             | 11.62  | 5.00             | 11.62  |
| Total                            | 90.55             | 100.00 | 90.55            | 100.00 | 90.55            | 100.00 |
|                                  |                   |        |                  |        |                  |        |
| Ingredient(gm)                   | gm                | kcal   | gm               | kcal   | gm               | kcal   |
| L-Arginine                       | 10                | 40     | 10               | 40     | 10               | 40     |
| L-Histidine-HCl-H <sub>2</sub> O | 6                 | 24     | 6                | 24     | 6                | 24     |
| L-Isoleucine                     | 8                 | 32     | 4                | 16     | 16               | 64     |
| L-Leucine                        | 12                | 48     | 6                | 24     | 24               | 96     |
| L-Valine                         | 8                 | 32     | 4                | 16     | 16               | 64     |
| L-Tyrosine                       | 4                 | 16     | 4                | 16     | 4                | 16     |
| L-Lysine-HCl                     | 14                | 56     | 14               | 56     | 14               | 56     |
| L-Methionine                     | 6                 | 24     | 6                | 24     | 6                | 24     |
| L-Phenylalanine                  | 8                 | 32     | 8                | 32     | 8                | 32     |
| L-Threonine                      | 8                 | 32     | 8                | 32     | 8                | 32     |
| L-Tryptophan                     | 2                 | 8      | 2                | 8      | 2                | 8      |
| L-Alanine                        | 10                | 40     | 10               | 40     | 10               | 40     |
| L-Asparagine-H <sub>2</sub> O    | 5                 | 20     | 5                | 20     | 5                | 20     |
| L-Aspartate                      | 10                | 40     | 10               | 40     | 10               | 40     |
| L-Cystine                        | 4                 | 16     | 4                | 16     | 4                | 16     |
| L-Glutamic Acid                  | 30                | 120    | 30               | 120    | 30               | 120    |
| L-Glutamine                      | 5                 | 20     | 5                | 20     | 5                | 20     |
| Glycine                          | 10                | 40     | 10               | 40     | 10               | 40     |
| L-Proline                        | 5                 | 20     | 5                | 20     | 5                | 20     |
| L-Serine                         | 5                 | 20     | 5                | 20     | 5                | 20     |
|                                  |                   |        |                  |        |                  |        |
| Corn Starch                      | 550.5             | 2202   | 564.5            | 2258   | 522.5            | 2090   |
| Maltodextrin                     | 125               | 500    | 125              | 500    | 125              | 500    |
| Cellulose                        | 50                | 0      | 50               | 0      | 50               | 0      |
|                                  |                   |        |                  |        |                  |        |
| Corn Oil                         | 50                | 450    | 50               | 450    | 50               | 450    |
|                                  |                   |        |                  |        |                  |        |
| Mineral Mix                      | 35                | 0      | 35               | 0      | 35               | 0      |
| Sodium Bicarbonate               | 7.5               | 0      | 7.5              | 0      | 7.5              | 0      |
|                                  |                   |        |                  |        |                  |        |
| Vitamin Mix                      | 10                | 40     | 10               | 40     | 10               | 40     |
| Choline Bitartrate               | 2                 | 0      | 2                | 0      | 2                | 0      |



|            |         |      |         |      |         |      |
|------------|---------|------|---------|------|---------|------|
|            |         |      |         |      |         |      |
| Yellow Dye | 0       | 0    | 0       | 0    | 0.025   | 0    |
| Blue Dye   | 0.05    | 0    | 0.025   | 0    | 0.025   | 0    |
| Red Dye    | 0       | 0    | 0.025   | 0    | 0       | 0    |
| Total      | 1000.05 | 3872 | 1000.05 | 3872 | 1000.05 | 3872 |
